# Supplementary material
Source: Springer Nature journal article supplement (https://www.springermedizin.de/resource/supplementary/12916_2011_455_MOESM3_ESM.pdf/9599722)
Supplement: MOESM3 [file 9599722]

Table 3 Adjusted\* hazard ratios (HR) of all-cause and cardiovascular deaths related to physical activity and metabolic syndrome (MetS) status in HUNT-2

|                    | Physical Activity Index |                     |                     |                     |
|--------------------|-------------------------|---------------------|---------------------|---------------------|
|                    | High                    | Moderate            | Low                 | Inactive            |
| <b>Total death</b> |                         |                     |                     |                     |
| Without MetS       |                         |                     |                     |                     |
| n                  | 11766                   | 8723                | 9940                | 1953                |
| Deaths             | 193                     | 200                 | 265                 | 83                  |
| Person years       | 134 119                 | 99 214              | 112 980             | 22 046              |
| HR (95% CI)        | 1.0 (Ref.) <sup>a</sup> | 1.02 (0.84 to 1.25) | 1.08 (0.89 to 1.30) | 1.54 (1.18 to 2.00) |
| MetS               |                         |                     |                     |                     |
| n                  | 2556                    | 2723                | 3750                | 854                 |
| Deaths             | 73                      | 114                 | 203                 | 70                  |
| Person years       | 28 119                  | 30 399              | 41 723              | 9357                |
| HR (95% CI)        | 1.13 (0.87 to 1.49)     | 1.26 (0.99 to 1.59) | 1.56 (1.28 to 1.92) | 2.13 (1.61 to 2.83) |
| <b>CVD</b>         |                         |                     |                     |                     |
| Without MetS       |                         |                     |                     |                     |
| n                  | 11766                   | 8723                | 9940                | 1953                |
| Deaths             | 31                      | 41                  | 48                  | 17                  |
| Person years       | 134 119                 | 99 214              | 112 980             | 22 046              |
| HR (95% CI)        | 1.0 (Ref.) <sup>a</sup> | 1.29 (0.81 to 2.07) | 1.18 (0.74 to 1.87) | 1.76 (0.97 to 3.22) |
| MetS               |                         |                     |                     |                     |
| n                  | 2556                    | 2723                | 3750                | 854                 |
| Deaths             | 17                      | 26                  | 61                  | 15                  |
| Person years       | 28 119                  | 30 399              | 41 723              | 9357                |
| HR (95% CI)        | 1.51 (0.83 to 2.73)     | 1.63 (0.96 to 2.77) | 2.75 (1.76 to 4.30) | 2.55 (1.35 to 4.79) |

\*Adjusted for age (continuous), sex (men and women), marital status [married, unmarried, widow(er), divorced/separated], education ( $\leq 10$ , 11-14,  $\geq 15$  years, and unknown), alcohol consumption (frequency last two weeks: 0, 1-4,  $\geq 5$ , total abstainer, and unknown), smoking status (never, former, current, and unknown), occupational activity (mostly sedentary, much walking, much walking & lifting, heavy physical work, and unknown)

<sup>a</sup>Participants who reported high physical activity and were without metabolic syndrome served as the reference group  
HR, hazard ratio; CI, confidence interval; MetS, metabolic syndrome; CVD, cardiovascular deaths; n, number of participants.
